# Supplementary material for: Heterobimetallic platinum(ii) complexes with increased cytotoxicity against ovarian cancer cell lines
Source: Royal Society of Chemistry journal article supplement (doi:10.1039/d1nj03533a), 2021-01-01
Supplement: d1nj03533a1.pdf [file d1nj03533a1.pdf]

## Heterobimetallic Platinum(II) Complexes with Increased Cytotoxicity against Ovarian Cancer Cell Lines

Lucie Melounková,<sup>a,b</sup> Miriam Syková,<sup>c</sup> Robert Jirásko,<sup>a</sup> Roman Jambor,<sup>c</sup> Radim Havelek,<sup>b</sup> Eva Peterová,<sup>b</sup> Jan Honzíček<sup>d</sup> and Jaromír Vinklárěk<sup>\*c</sup>

Supplementary information

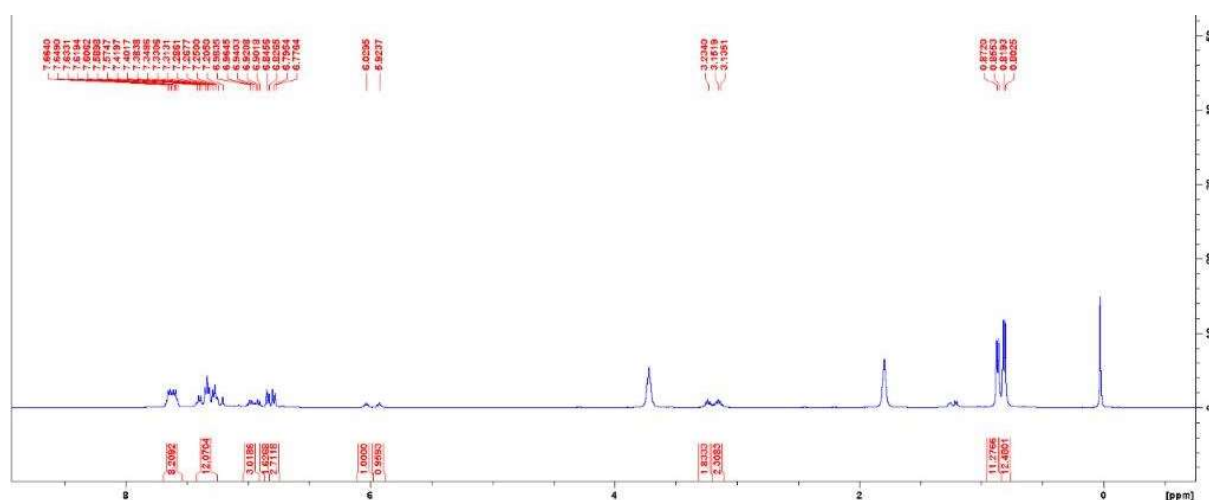

Figure S1 <sup>1</sup>H NMR spectrum of **2** in CDCl<sub>3</sub>.

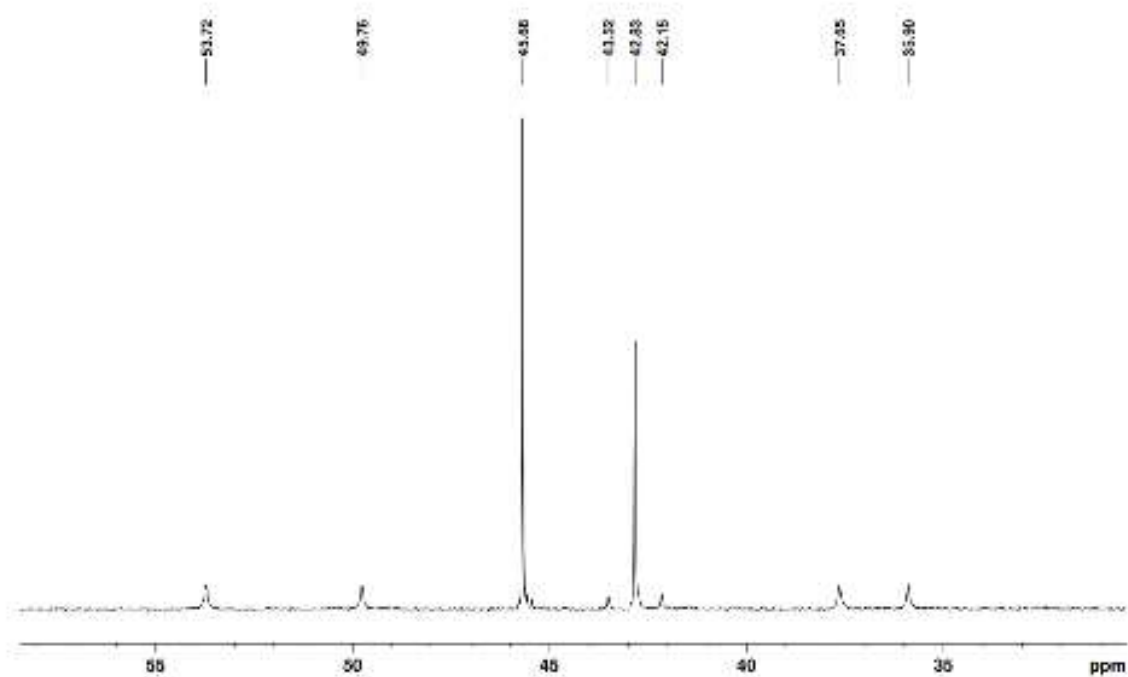

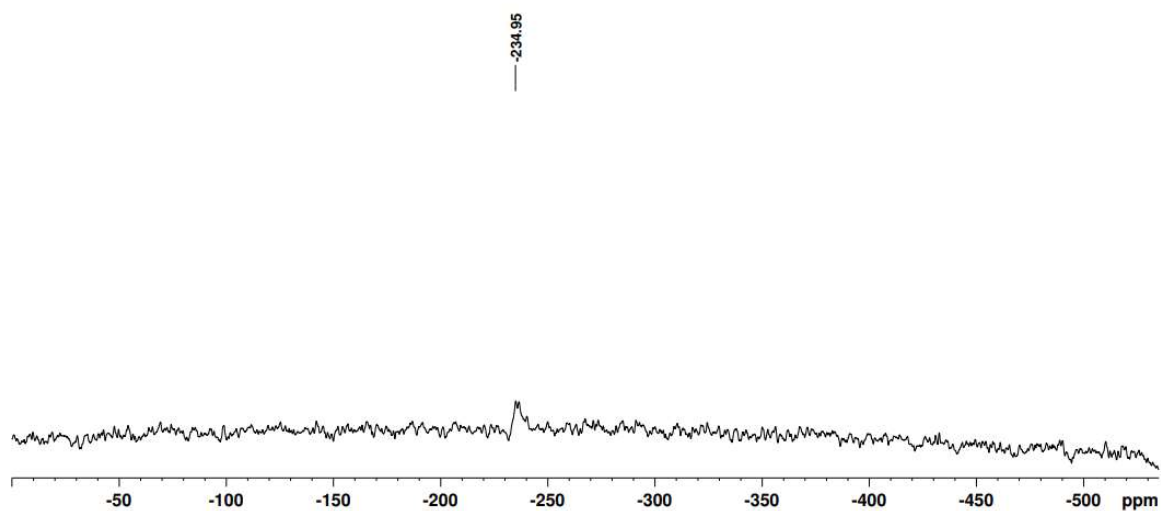

**Figure S3**  $^{119}\text{Sn}$  NMR spectrum of **2** in  $\text{CDCl}_3$ .

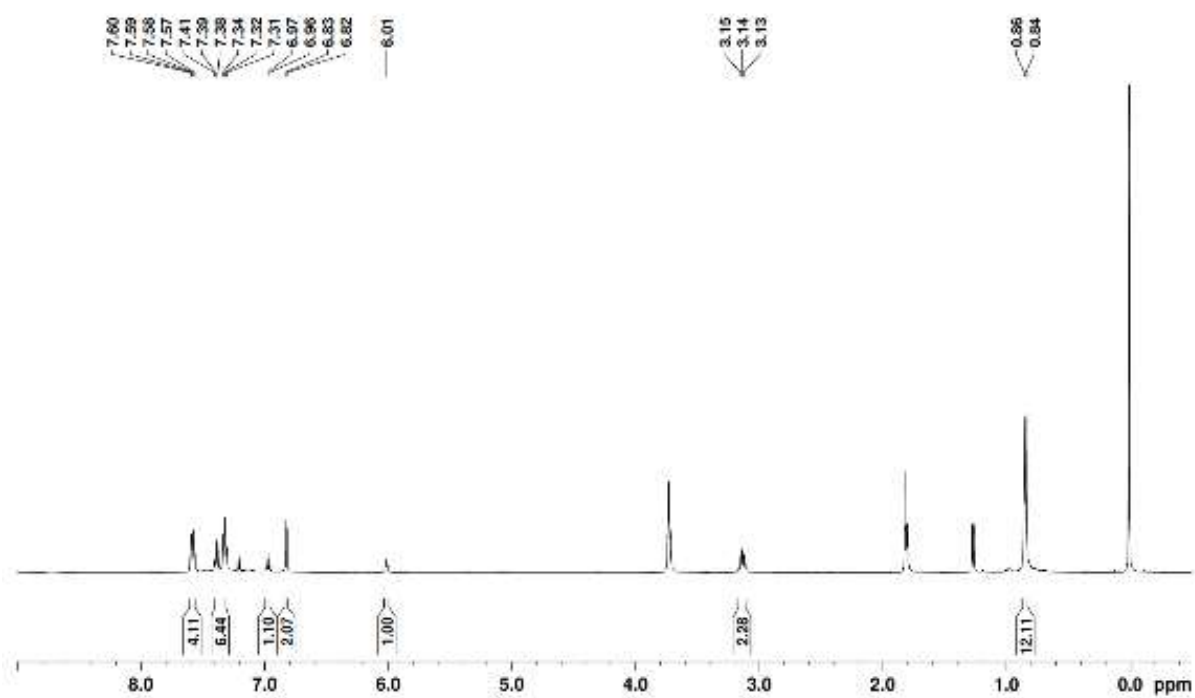

**Figure S4**  $^1\text{H}$  NMR spectrum of **3** in  $\text{CDCl}_3$ .

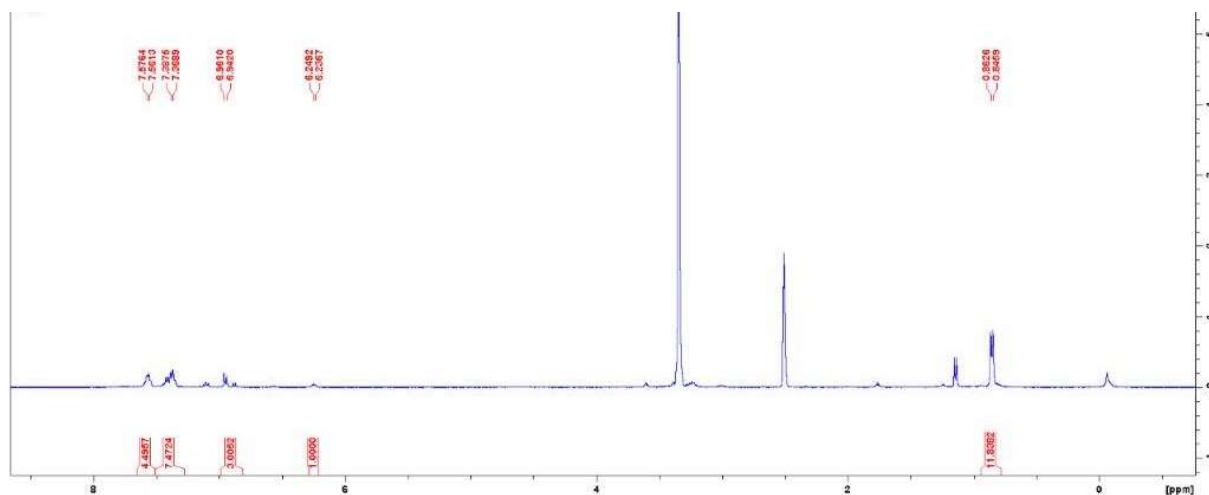

**Figure S5** <sup>1</sup>H NMR spectrum of **3** in DMSO-d<sub>6</sub>.

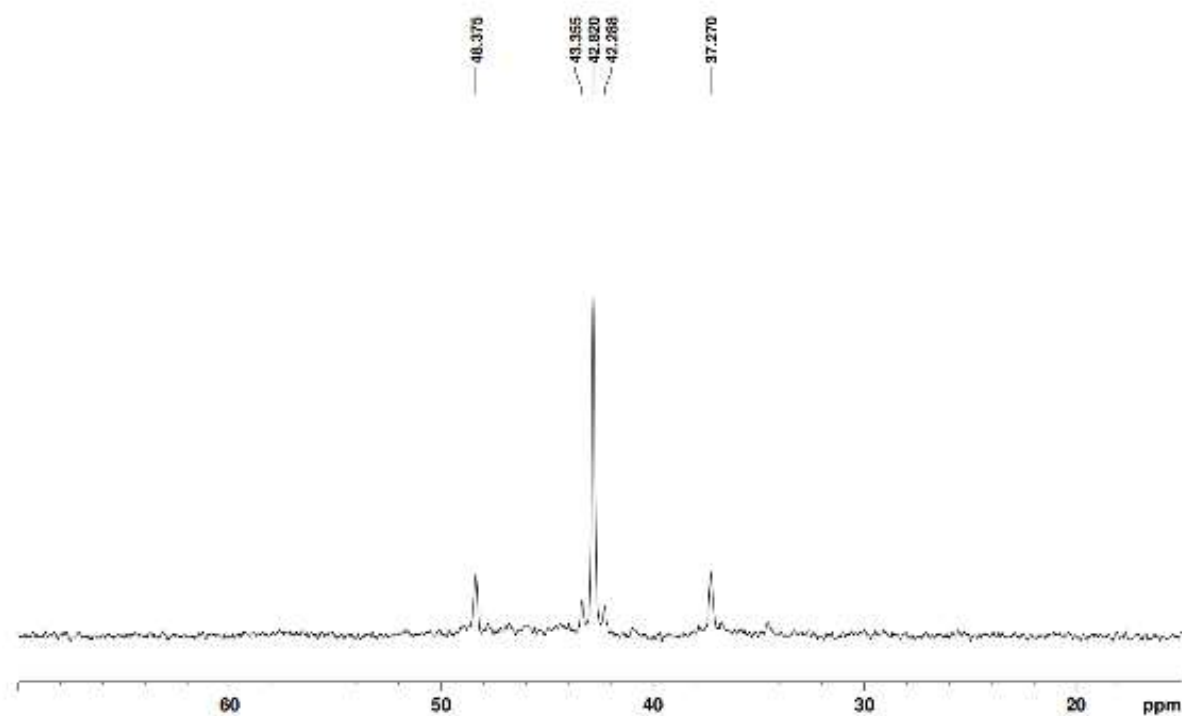

**Figure S6** <sup>31</sup>P NMR spectrum of **3** in CDCl<sub>3</sub>.

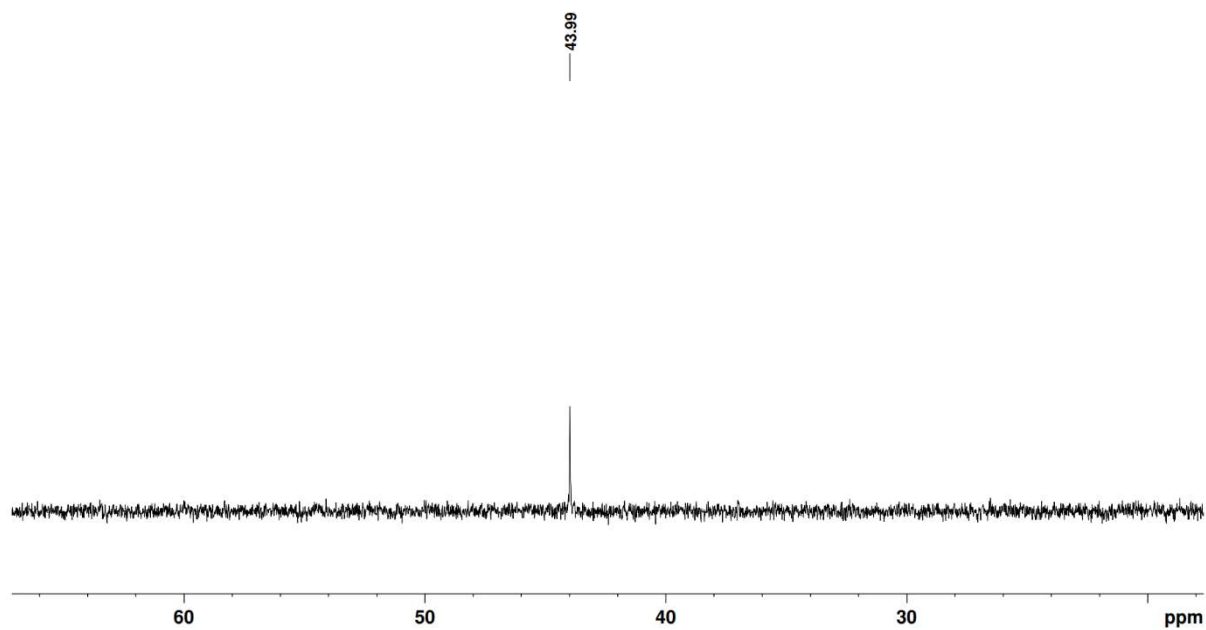

**Figure S7**  $^{31}\text{P}$  NMR spectrum of **3** in  $\text{DMSO-d}_6$ .

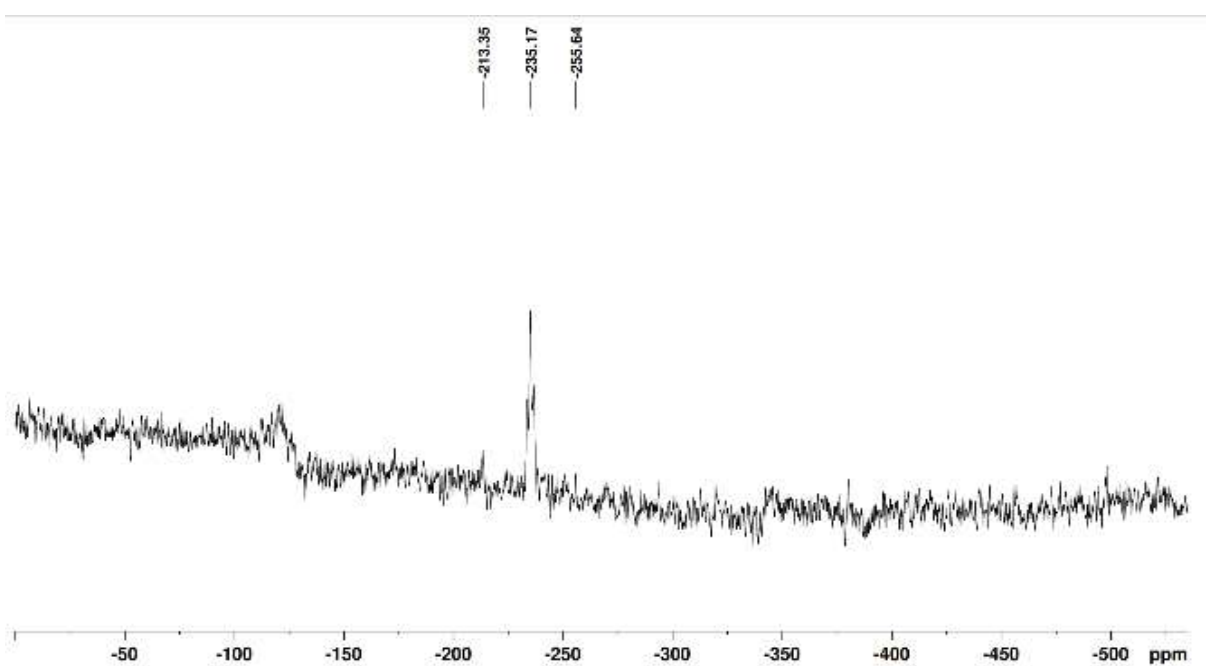

**Figure S8**  $^{119}\text{Sn}$  NMR spectrum of **3** in  $\text{CDCl}_3$ .

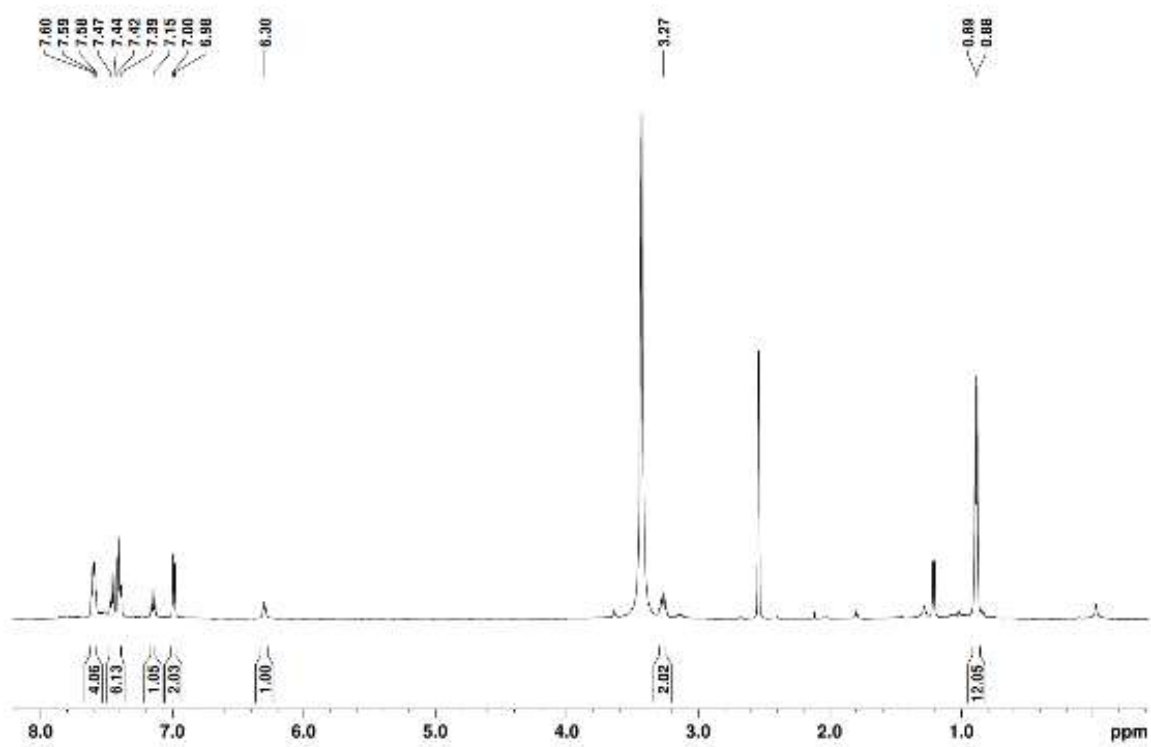

**Figure S9**  $^1\text{H}$  NMR spectrum of **4** in  $\text{DMSO-d}_6$ .

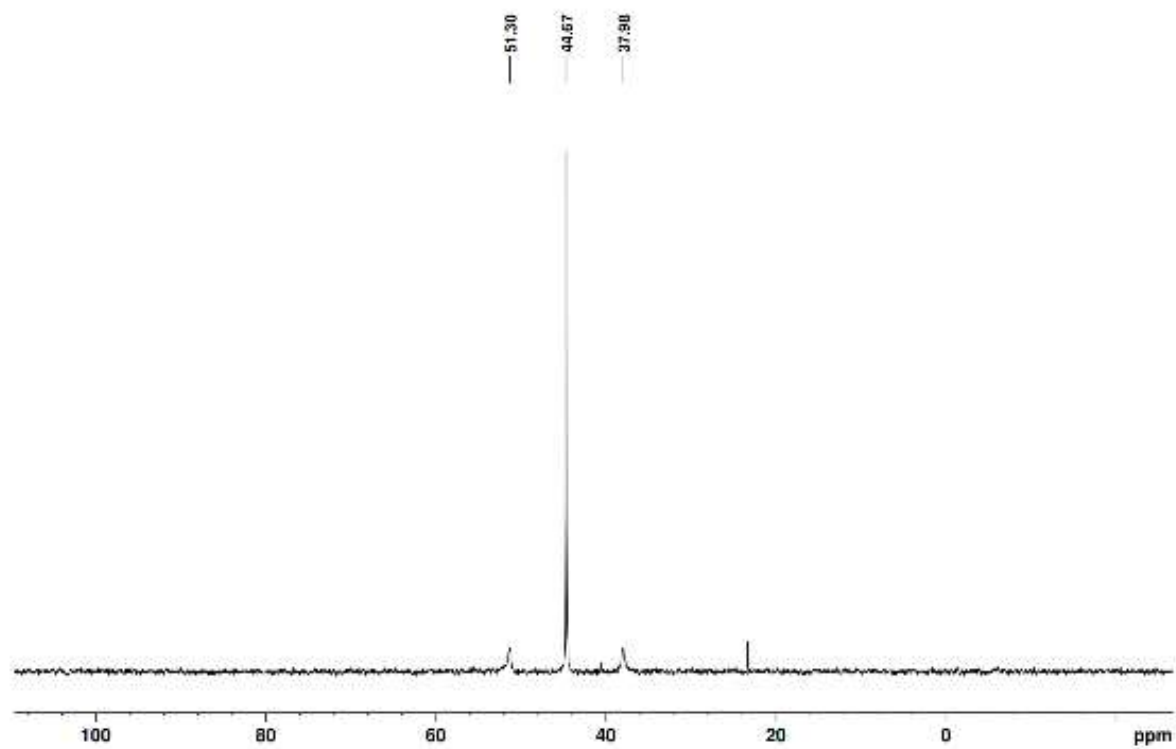

**Figure S10**  $^{31}\text{P}$  NMR spectrum of **4** in  $\text{DMSO-d}_6$ .

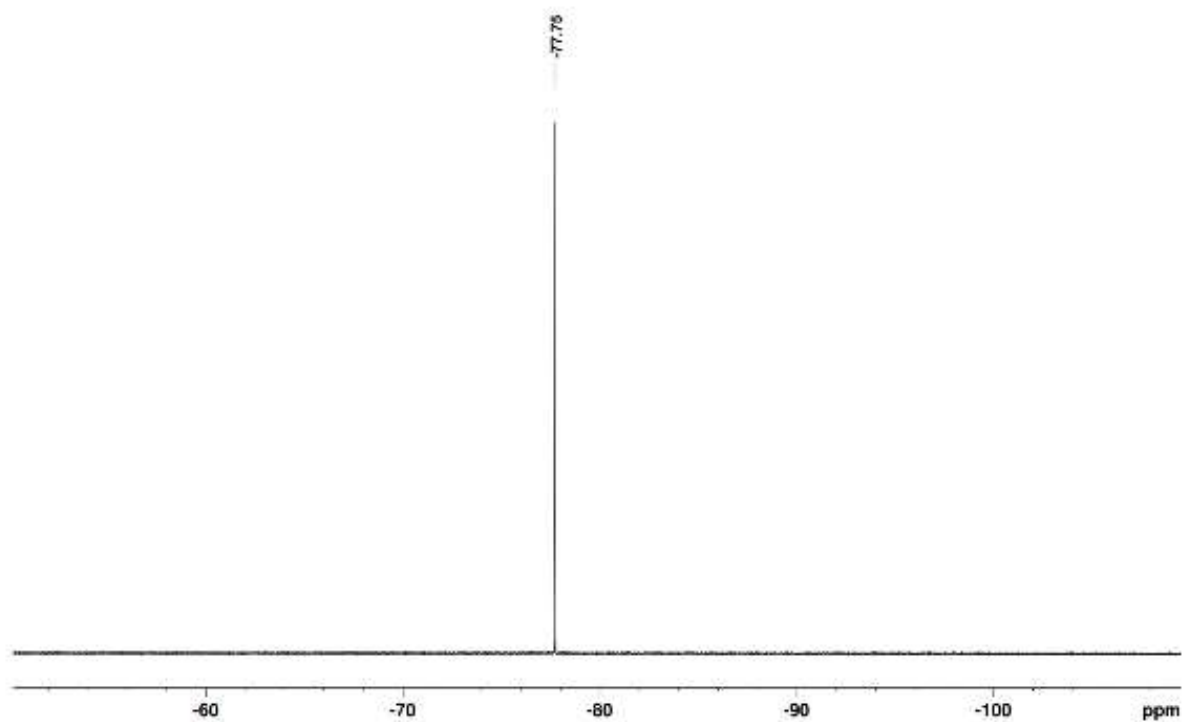

**Figure S11**  $^{19}\text{F}$  NMR spectrum of **4** in  $\text{DMSO-d}^6$ .

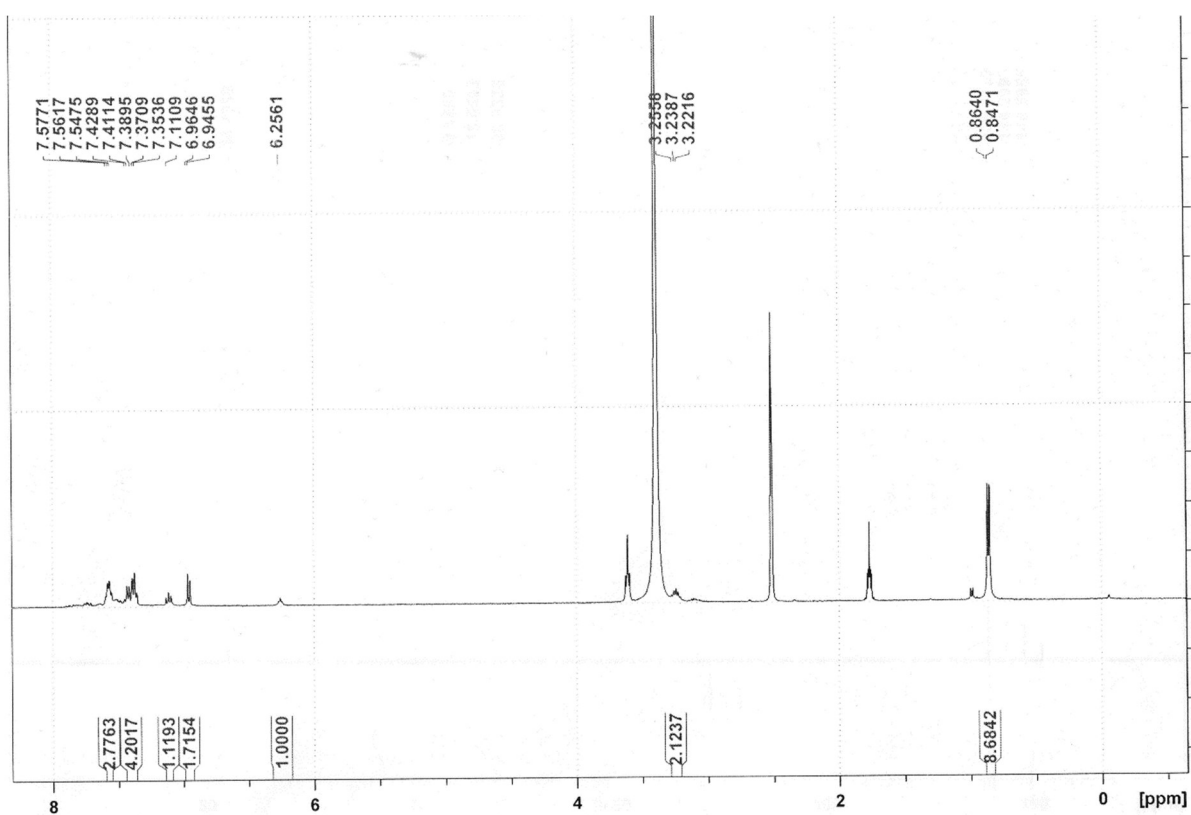

**Figure S12**  $^1\text{H}$  NMR spectrum of **5** in  $\text{DMSO-d}^6$ .

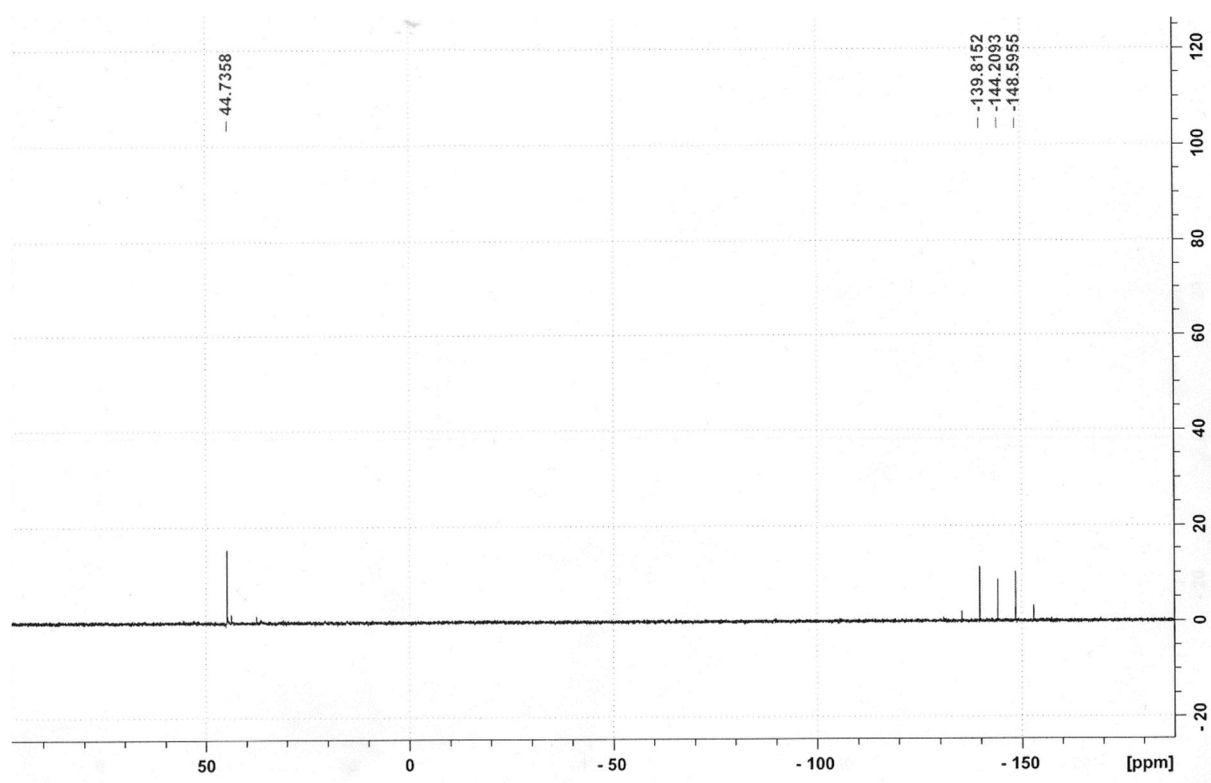

**Figure S13**  $^{31}\text{P}$  NMR spectrum of **5** in  $\text{DMSO-d}_6$ .

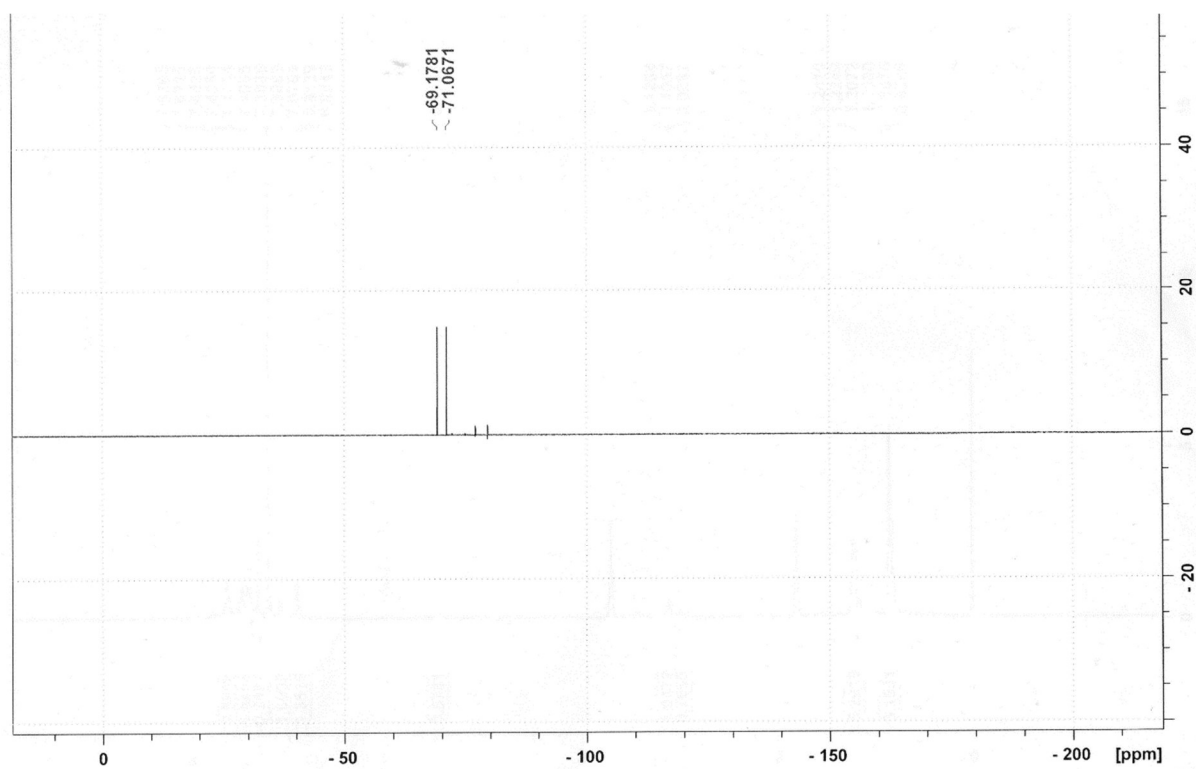

**Figure S14**  $^{19}\text{F}$  NMR spectrum of **5** in  $\text{DMSO-d}_6$ .

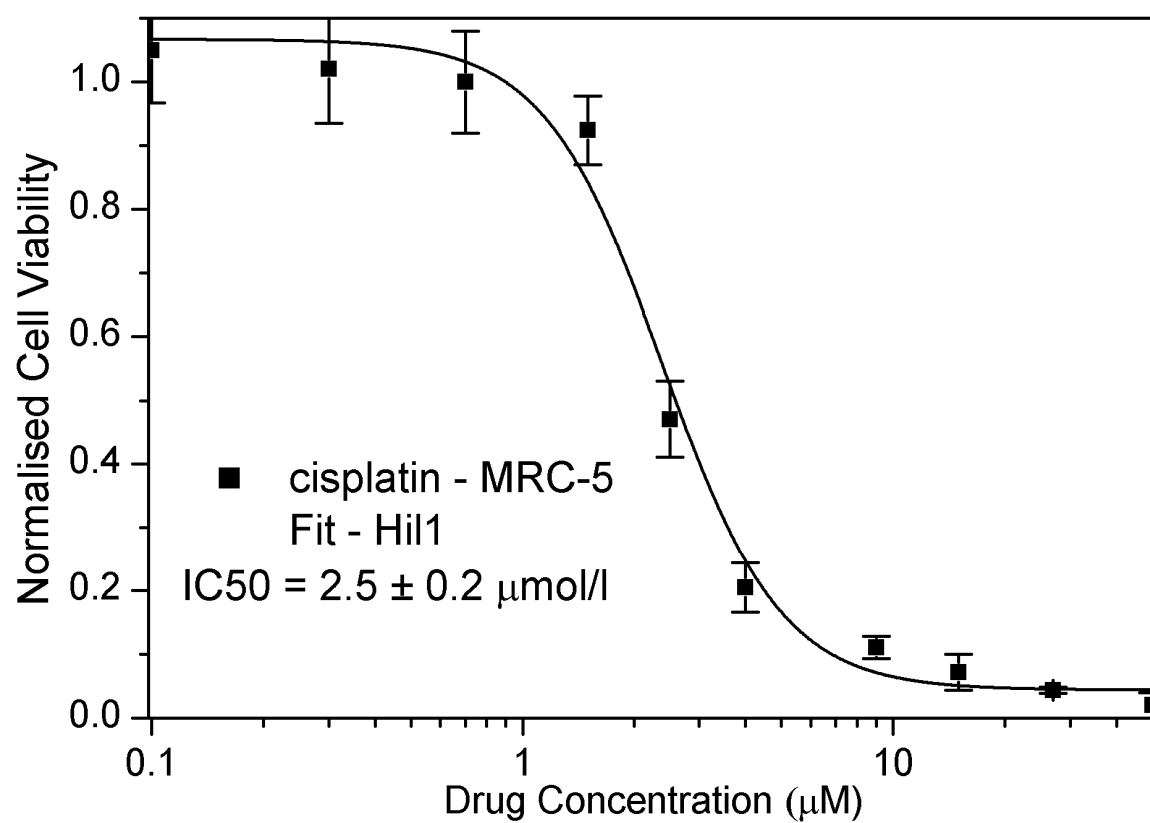

**Figure S15** Cytotoxic curves determined by WST-1 assay for cisplatin
