# Supplementary material for: Heterobimetallic platinum(ii) complexes with increased cytotoxicity against ovarian cancer cell lines
Source: Royal Society of Chemistry journal article supplement (doi:10.1039/d1nj03533a), 2021-01-01
Supplement: d1nj03533a2.pdf [file d1nj03533a2.pdf]

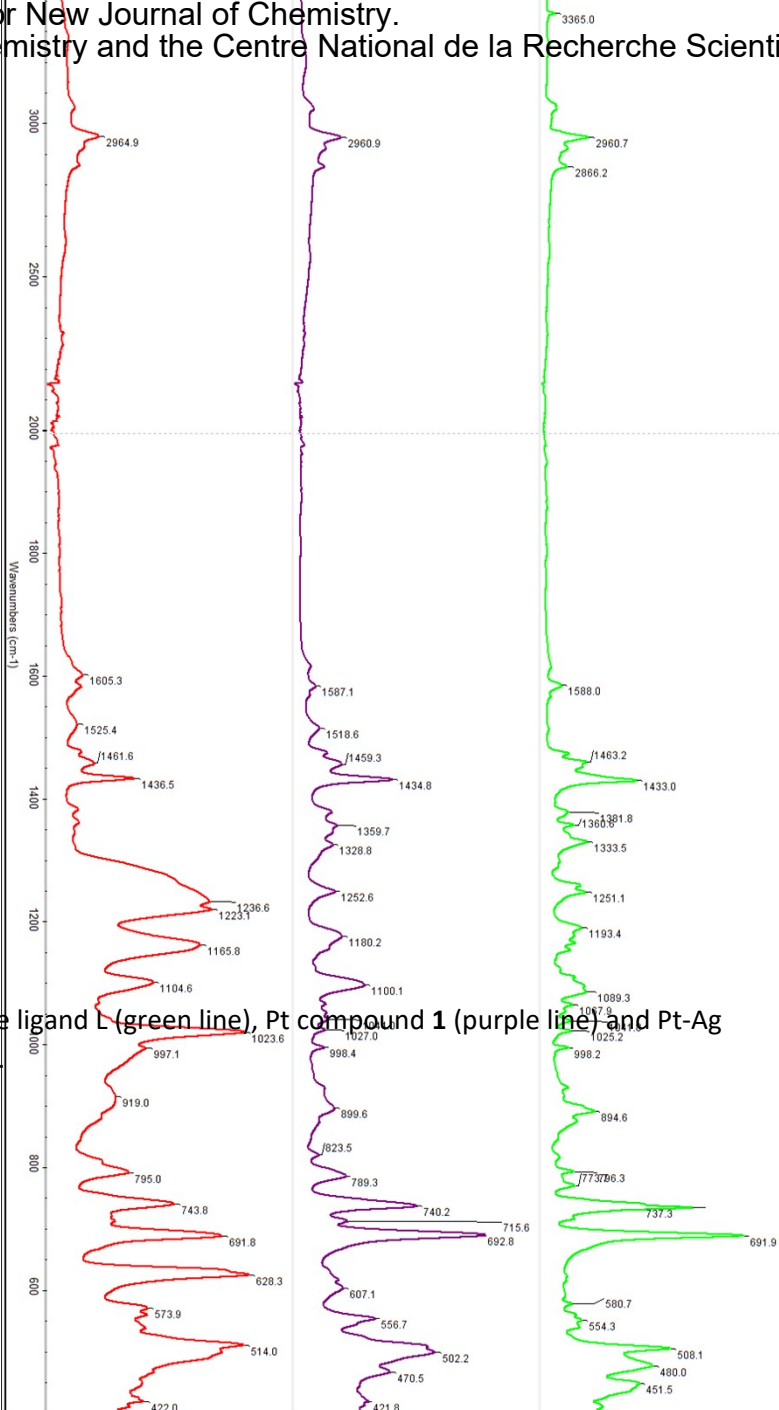

**Figure SI-1.** Infrared spectra of free ligand **L** (green line), Pt compound **1** (purple line) and Pt-Ag compound **4** (red line).
